# Supplementary material for: Nanopore Sequencing Unveils Diverse Transcript Variants of the Epithelial Cell-Specific Transcription Factor Elf-3 in Human Malignancies
Source: MDPI journal article supplement (doi:10.3390/genes12060839), 2021-05-29
Supplement: s1 [file s1]

**Supplementary Table S1.** Primers used in RT-PCR for the validation of the novel splice junctions. The number(s) appearing in primer names denote the number of each exon, while “/” shows that the primer is designed to target a particular splice junction; “N” indicates a novel exon, and “alt” stands for “alternative exon”. Melting temperature ( $T_m$ ) was calculated by Primer-BLAST.

| Direction | Name    | Sequence (5'→3')        | Length (nt) | $T_m$ (°C) |
|-----------|---------|-------------------------|-------------|------------|
| Forward   | 1/3F    | CTCCGCCACTCCGAGAAG      | 18          | 59.5       |
|           | 1alt/3F | TCCGAGCAAGAGCAGAAGG     | 19          | 59.4       |
|           | 1/4F    | CGCCACTCCGCTTCCAG       | 17          | 60.5       |
|           | 1/5F    | CCGCCACTCCGACCAGG       | 17          | 62.2       |
|           | 1/7F    | CGCCACTCCGATGGTTTTCG    | 20          | 62.0       |
|           | 1/8F    | CGCCACTCCGCGCCCAG       | 17          | 66.4       |
|           | 2/4F    | ATTGGAGGGTACAGCTTCCAGC  | 22          | 62.3       |
|           | 2/5F    | CATTGGAGGGTACAGACCAGG   | 21          | 59.8       |
|           | 2/8F    | GGAGGGTACAGCGCCCAG      | 18          | 62.2       |
|           | 2/9F    | GTCATTGGAGGGTACAGGTACTA | 23          | 58.7       |
|           | 3/5F    | GAGACCTCAACCAGGGCAG     | 19          | 59.7       |
|           | 3/7F    | CTGCGAGACCTCAATGGTTTTC  | 22          | 59.8       |
|           | 3/8F    | CGAGACCTCACGCCCAG       | 17          | 59.5       |
|           | 3/9F    | TGCGAGACCTCAGTACTACTACA | 23          | 60.1       |
|           | 4/8F    | AGGGCCCTTTGCGCCCA       | 17          | 64.6       |
|           | 4/9F    | CAGGGCCCTTTGGTACTACTA   | 21          | 58.5       |
|           | 5/7F    | TCTCCACCGCAGATGGTTTTC   | 21          | 60.6       |
|           | 5/9F    | GTCTCCACCGCAGGTACTACTA  | 22          | 60.7       |
|           | 6/9F    | CTTCCCCAGCGGTACTACTAC   | 21          | 59.3       |
|           | 7/9F    | GAAGAGCAAGCACGGTACTACTA | 23          | 59.9       |
|           | N1/8F   | ACACCCTCAATCGCCCAGAG    | 20          | 61.9       |
|           | 8/N2F   | GCCATGAGAGGCAAGGGTC     | 19          | 60.5       |
| Reverse   | 3R      | CTCAAGGGCACAATTGCAGAG   | 21          | 59.8       |
|           | 5R      | GTGGAGACGTCAGAGCTGC     | 19          | 60.5       |
|           | 7R      | GCTTGCTCTTCTTGCCCTC     | 19          | 58.8       |
|           | 8R      | GGCTCAGCTTCTCGTAGGTC    | 20          | 59.9       |
|           | 9R      | TCCGACTCTGGAGAACCTCT    | 20          | 59.3       |
