# Supplementary material for: Nanopore Sequencing Unveils Diverse Transcript Variants of the Epithelial Cell-Specific Transcription Factor Elf-3 in Human Malignancies
Source: MDPI journal article supplement (doi:10.3390/genes12060839), 2021-05-29
Supplement: s1 [file s1]

**Supplementary Table S2.** Primer pairs used in RT-PCR for the validation of each novel splice junction.

| Splice junction          | Primer name |         | Amplicon size (bp) |
|--------------------------|-------------|---------|--------------------|
|                          | Forward     | Reverse |                    |
| Exon 1 (120 bp) - Exon 3 | 1/3F        | 3R      | 174                |
| Exon 1 (234 bp) – Exon 3 | 1alt/3F     | 3R      | 174                |
| Exon 1 (120 bp) - Exon 4 | 1/4F        | 5R      | 162                |
| Exon 1 (120 bp) - Exon 5 | 1/5F        | 5R      | 126                |
| Exon 1 (120 bp) - Exon 7 | 1/7F        | 7R      | 124                |
| Exon 1 (120 bp) - Exon 8 | 1/8F        | 8R      | 196                |
| Exon 2 - Exon 4          | 2/4F        | 5R      | 222                |
| Exon 2 - Exon 5          | 2/5F        | 5R      | 130                |
| Exon 2 - Exon 8          | 2/8F        | 8R      | 197                |
| Exon 2 - Exon 9          | 2/9         | 9R      | 127                |
| Exon 3 - Exon 5          | 3/5F        | 5R      | 124                |
| Exon 3 - Exon 7          | 3/7F        | 7R      | 127                |
| Exon 3 - Exon 8          | 3/8F        | 8R      | 196                |
| Exon 3 - Exon 9          | 3/9F        | 9R      | 122                |
| Exon 4 - Exon 8          | 4/8F        | 8R      | 197                |
| Exon 4 - Exon 9          | 4/9F        | 9R      | 122                |
| Exon 5 - Exon 7          | 5/7F        | 7R      | 126                |
| Exon 5 - Exon 9          | 5/9F        | 9R      | 123                |
| Exon 6 - Exon 9          | 6/9F        | 9R      | 121                |
| Exon 7 - Exon 9          | 7/9F        | 9R      | 124                |
| Exon N1 - Exon 8         | N1/8F       | 8R      | 197                |
| Exon 8 - Exon N2         | 8/N2F       | 9R      | 209                |
